# Supplementary material
Source: publisher site journal article supplement (https://static.cambridge.org/content/id/urn:cambridge.org:id:article:S0033822219000055/resource/name/S0033822219000055supp001.docx)
Supplement: Supplementary file 1 [file S0033822219000055supp001.docx]

Complete Bayesian Model

Plot()

{

Outlier_Model("General",T(5),U(0,4),"t");

Sequence()

{

Tau_Boundary("");

Phase("VIII")

{

R_Date("OxA 31974", 3222, 30)

{

Outlier(0.05);

};

R_Date("OxA 31973", 3245, 29)

{

Outlier(0.05);

};

R_Date("OxA 31975", 3290, 29)

{

Outlier(0.05);

};

R_Date("OxA-35228", 3303, 32)

{

Outlier(0.05);

};

R_Date("OxA 31680", 3316, 31)

{

Outlier(0.05);

};

R_Date("OxA-35229", 3847, 36)

{

Outlier(0.05);

};

};

Boundary("Transition VIII/VII");

Phase("VII")

{

};

Boundary("Transition VII/VI")

{

R_Date("OxA 33262", 2997, 29)

{

Outlier(0.05);

};

R_Date("OxA 33263", 3014, 34)

{

Outlier(0.05);

};

};

Phase("VI")

{

};

Boundary("End VI")

{

R_Date("OxA 31570", 2888, 30)

{

Outlier(0.05);

};

R_Date("OxA 31976", 2907, 27)

{

Outlier(0.05);

};

R_Date("OxA 31978", 2934, 28)

{

Outlier(0.05);

};

R_Date("OxA 31671", 2973, 26)

{

Outlier(0.05);

};

R_Date("OxA 31977", 2996, 28)

{

Outlier(0.05);

};

R_Date("OxA 31569", 3005, 29)

{

Outlier(0.05);

};

R_Date("OxA 31981", 2890, 28)

{

Outlier(0.05);

};

R_Date("OxA-X-2605-21", 2917, 38)

{

Outlier(0.05);

};

R_Date("OxA-X-2605-20", 2949, 35)

{

Outlier(0.05);

};

R_Date("OxA 31980", 2965, 27)

{

Outlier(0.05);

};

R_Date("OxA-X-2605-19", 2982, 32)

{

Outlier(0.05);

};

R_Date("OxA 31979 ", 3020, 28)

{

Outlier(0.05);

};

};

Phase("Khirbet Arai, Iron IB, Philistine Bi-chrome pottery")

{

R_Date("OxA-33469", 2825, 30)

{

Outlier(0.05);

};

R_Date("OxA-33468", 2829, 29)

{

Outlier(0.05);

};

R_Date("OxA-33477 ", 2899, 29)

{

Outlier(0.05);

};

R_Date("OxA-33475 ", 2929, 29)

{

Outlier(0.05);

};

R_Date("OxA-33476 ", 2969, 31)

{

Outlier(0.05);

};

};

Boundary("Iron IB/IIA");

Phase("Age IIa")

{

Sequence("Qeiyafa")

{

Boundary();

Phase("Olive pits from the level")

{

R_Date("OxA-25615", 2796, 29)

{

Outlier(0.05);

};

R_Date("OxA-19588", 2799, 31)

{

Outlier(0.05);

};

R_Date("OxA-23504", 2827, 27)

{

Outlier(0.05);

};

R_Date("OxA-22045", 2830, 30)

{

Outlier(0.05);

};

R_Date("OxA-19426", 2837, 29)

{

Outlier(0.05);

};

R_Date("OxA-23506", 2843, 26)

{

Outlier(0.05);

};

R_Date("OxA-19425", 2851, 31)

{

Outlier(0.05);

};

R_Date("OxA-23505", 2852, 26)

{

Outlier(0.05);

};

R_Date("OxA-22044", 2858, 33)

{

Outlier(0.05);

};

R_Date("OxA-19589", 2883, 29)

{

Outlier(0.05);

};

R_Date("OxA-19127", 2910, 26)

{

Outlier(0.05);

};

};

Boundary("Destruction")

{

R_Combine()

{

Outlier(0.05);

R_Date("OxA-27747 ", 2823, 27)

{

};

R_Date("OxA-27783", 2825, 26)

{

};

R_Date("OxA-27612 ", 2838, 27)

{

};

R_Date("OxA-27613", 2884, 28)

{

};

};

};

};

R_Combine("Arai destruction")

{

Outlier(0.05);

R_Date("OxA-34501", 2922, 30)

{

};

R_Date("OxA-34969",2878,30)

{

};

R_Date("OxA-34970",2842,30)

{

};

};

};

Boundary("Start V");

Phase("V")

{

R_Date("OxA 33106", 2717, 32)

{

Outlier(0.05);

};

R_Date("OxA 33107", 2822, 33)

{

Outlier(0.05);

};

R_Date("OxA 34760", 2701, 28)

{

Outlier(0.05);

};

R_Date("OxA 34761", 2734, 30)

{

Outlier(0.05);

};

R_Date("OxA 34754", 2753, 27)

{

Outlier(0.05);

};

R_Date("OxA 34777", 2801, 24)

{

Outlier(0.05);

};

R_Date("OxA-34889", 2970, 26)

{

Outlier(0.05);

};

};

Boundary("Transition V/IVb");

Phase("IVb")

{

R_Date("OxA 34786", 2674, 24)

{

Outlier(0.05);

};

R_Date("OxA 34784", 2701, 24)

{

Outlier(0.05);

};

R_Date("OxA 34783", 2713, 24)

{

Outlier(0.05);

};

R_Date("OxA 34785", 2728, 25)

{

Outlier(0.05);

};

};

Boundary("Transition IVb/IVa");

Phase("IVa")

{

R_Date("OxA 34781", 2624, 23)

{

Outlier(0.05);

};

R_Date("OxA 34779", 2639, 24)

{

Outlier(0.05);

};

R_Date("OxA 34780", 2659, 24)

{

Outlier(0.05);

};

R_Date("OxA 34782", 2668, 24)

{

Outlier(0.05);

};

R_Date("OxA 34778", 2786, 24)

{

Outlier(0.05);

};

};

Boundary("End IVa");

Phase("III")

{

};

Boundary("End III",N(BC(701),1));

};

};
